# Supplementary material
Source: Springer Nature journal article supplement (https://www.springermedizin.de/resource/supplementary/12887_2013_1003_MOESM2_ESM.pdf/9476932)
Supplement: MOESM2 [file 9476932]

## Enrollment

Assessed for eligibility (n= 47)

Excluded (n= 12)

- ◆ Not meeting inclusion criteria (n= 6)
- ◆ Declined to participate (n= 5)
- ◆ Other reasons (n= 0)

Randomized (n= 36)

## Allocation

Allocated to intervention (n=19)

- ◆ Received allocated intervention (n=19)

Allocated to Placebo (n= 17)

## Follow-Up

Lost to follow-up (n=0)

Discontinued intervention (n=0)

Lost to follow-up (n= 0)

Discontinued intervention (n= 0)

## Analysis

Analysed (n=19 )

- ◆ Excluded from analysis (n= 0)

Analysed (n=17)

- ◆ Excluded from analysis (n= 0)
